# Supplementary material for: Realizing High Brightness Quasi‐2D Perovskite Light‐Emitting Diodes with Reduced Efficiency Roll‐Off via Multifunctional Interface Engineering
Source: PubMed Central journal article supplement (PMC10502845; doi:10.1002/advs.202302232), 2023-07-03
Supplement: ADVS-10-2302232-s001.pdf [file ADVS-10-2302232-s001.pdf]

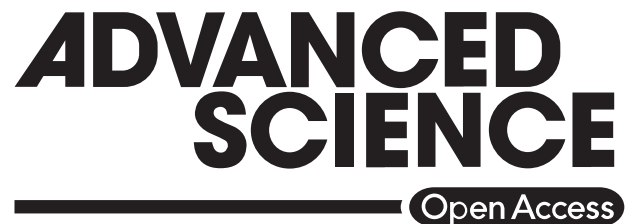

## Supporting Information

for *Adv. Sci.*, DOI 10.1002/adv.202302232

Realizing High Brightness Quasi-2D Perovskite Light-Emitting Diodes with Reduced Efficiency Roll-Off via Multifunctional Interface Engineering

*Yu-Kuan Lin, Chiung-Han Chen, Yen-Yu Wang, Ming-Hsuan Yu, Jing-Wei Yang, I-Chih Ni, Bi-Hsuan Lin, Ivan S. Zhidkov, Ernst Z. Kurmaev, Yu-Jung Lu\* and Chu-Chen Chueh\**

## Supporting Information

### **Realizing High Brightness Quasi-2D Perovskite Light-Emitting Diodes with Reduced Efficiency Roll-Off via Multifunctional Interface Engineering**

*Yu-Kuan Lin,<sup>a</sup> Chiung-Han Chen,<sup>a</sup> Yen-Yu Wang,<sup>b</sup> Ming-Hsuan Yu,<sup>a</sup> Jing-Wei Yang,<sup>b</sup> I-Chih Ni,<sup>c</sup> Bi-Hsuan Lin,<sup>d</sup> Ivan S. Zhidkov,<sup>e,f</sup> Ernst Z. Kurmaev,<sup>e,f</sup> Yu-Jung Lu<sup>b,g\*</sup> and Chu-Chen Chueh<sup>a,h\*</sup>*

<sup>a</sup> Y.-K. Lin, C.-H. Chen, M.-H. Yu and Prof. C.-C. Chueh  
Department of Chemical Engineering, National Taiwan University, Taipei 10617, Taiwan

<sup>b</sup> Y.-Y. Wang, J.-W. Yang and Prof. Y.-J. Lu  
Research Center for Applied Sciences, Academia Sinica, Taipei 11529, Taiwan

<sup>c</sup> I.-C. Ni  
Graduate Institute of Photonics and Optoelectronics, National Taiwan University, Taipei 10617, Taiwan

<sup>d</sup> Dr. B.-H. Lin  
National Synchrotron Radiation Research Center, Hsinchu 30076, Taiwan

<sup>e</sup> Prof. I. S. Zhidkov and Prof. E. Z. Kurmaev,  
Institute of Physics and Technology, Ural Federal University, Yekaterinburg 620002, Russia

<sup>f</sup> Prof. I. S. Zhidkov and Prof. E. Z. Kurmaev  
M. N. Mikheev Institute of Metal Physics of Ural Branch of Russian Academy of Sciences, Yekaterinburg 620108, Russia

<sup>g</sup> Prof. Y.-J. Lu  
Department of Physics, National Taiwan University, Taipei 10617, Taiwan

<sup>h</sup> Prof. C.-C. Chueh  
Advanced Research Center for Green Materials Science and Technology, National Taiwan University, Taipei 10617, Taiwan

\*Corresponding author. E-mail: cchueh@ntu.edu.tw; yujunglu@gate.sinica.edu.tw

**Keywords:** Light-emitting diodes; quasi-2D perovskite; efficiency roll-off; interface engineering; hole blocking

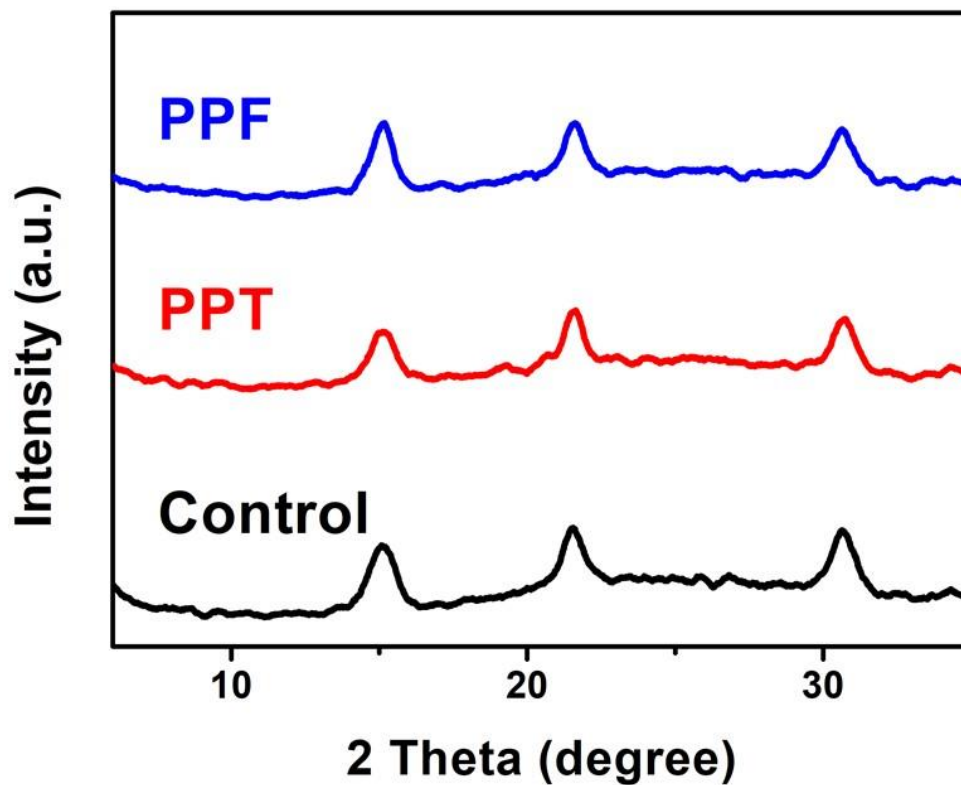

**Figure S1.** XRD characteristics of the pristine, PPT-modified and PPF-modified perovskite films.

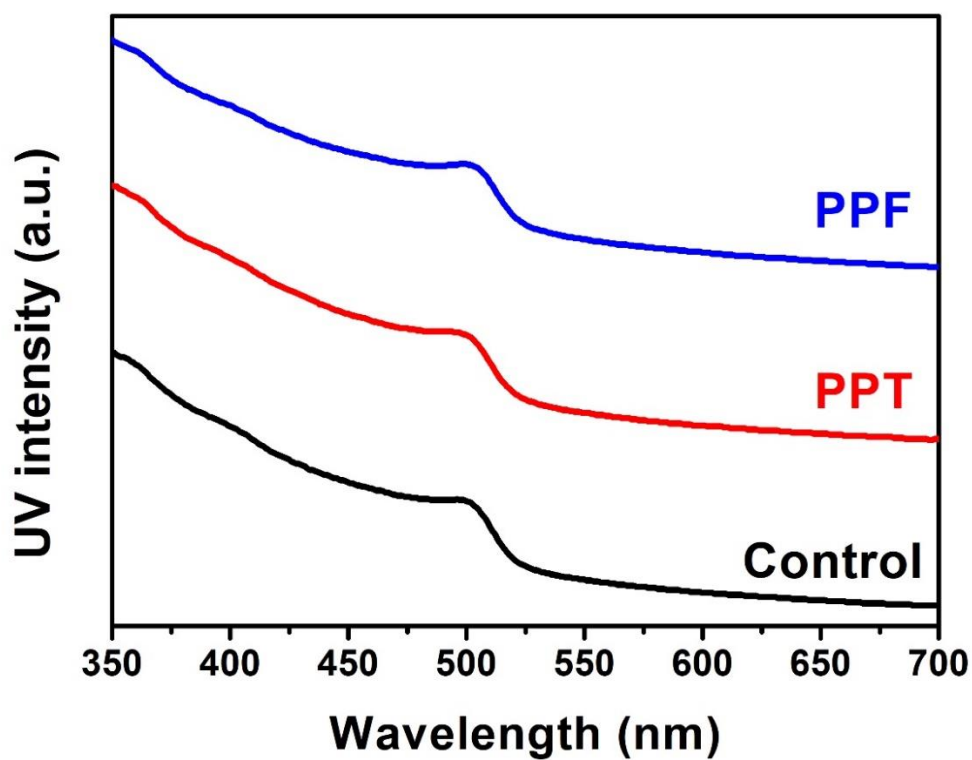

**Figure S2.** UV-vis absorption spectra of the pristine, PPT-modified and PPF-modified perovskite films.

**Table S1.** Biexponential fitting parameters for the TRPL results.

|                | $A_1$              | $\tau_1$ (ns) | $A_2$              | $\tau_2$ (ns) | $\tau_{\text{avg}}$ (ns) |
|----------------|--------------------|---------------|--------------------|---------------|--------------------------|
| <b>Control</b> | $4.44 \times 10^4$ | 6.26          | $4.88 \times 10^3$ | 45.5          | 10.1                     |
| <b>PPT</b>     | $3.67 \times 10^4$ | 6.83          | $4.33 \times 10^3$ | 57.4          | 12.2                     |
| <b>PPF</b>     | $1.90 \times 10^4$ | 8.21          | $3.82 \times 10^3$ | 67.6          | 18.2                     |

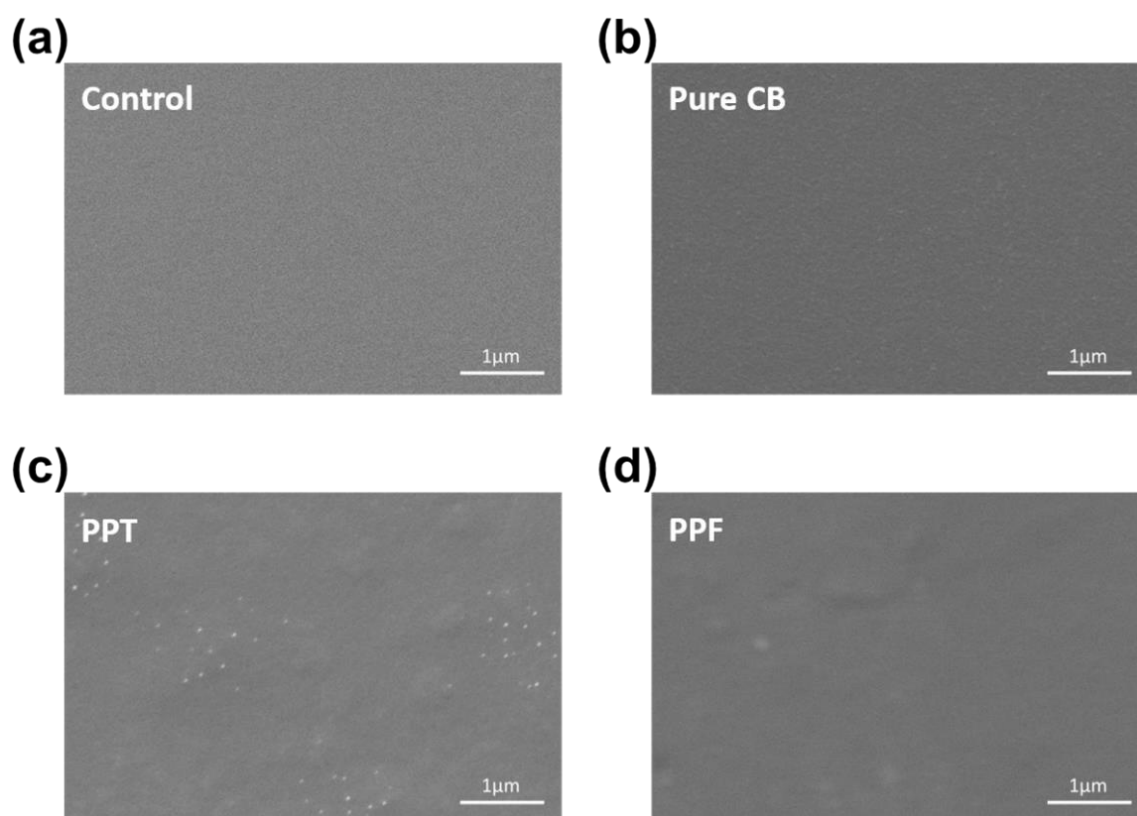

**Figure S3.** SEM images of the (a) pristine, (b) CB-treated, (c) PPT-modified and (d) PPF-modified perovskite films.

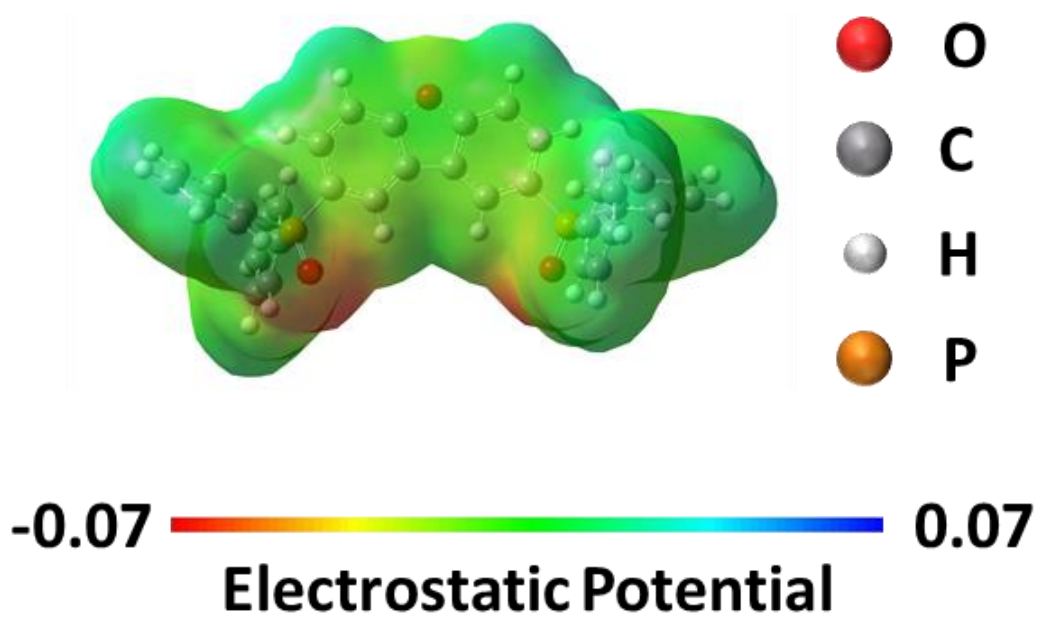

Figure S4. ESP map of PPF molecule.

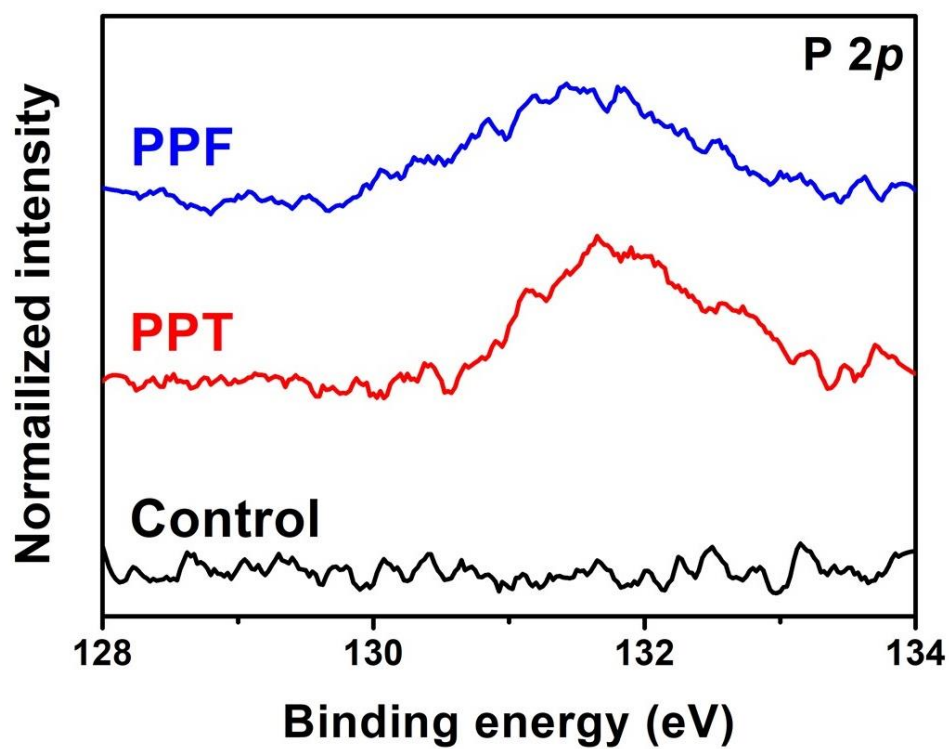

Figure S5. XPS spectra of P 2p signal for the pristine, PPT-modified and PPF-modified perovskite films.

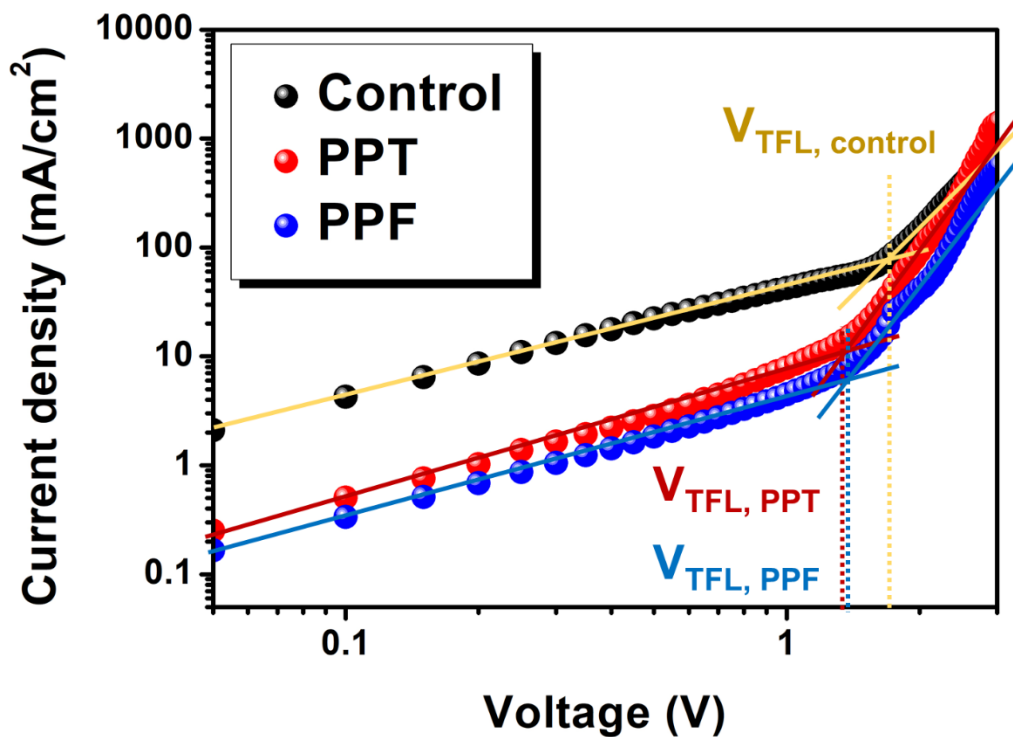

Figure S6.  $J$ - $V$  characteristics of the studied hole-only devices.

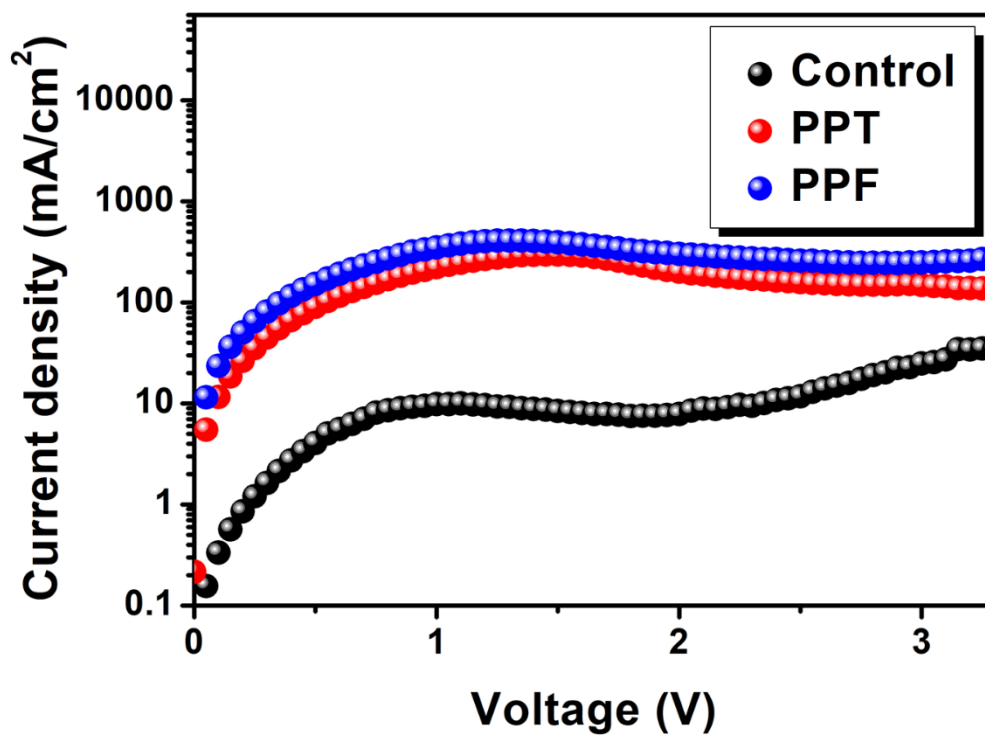

Figure S7.  $J$ - $V$  characteristics of the studied electron-only devices.

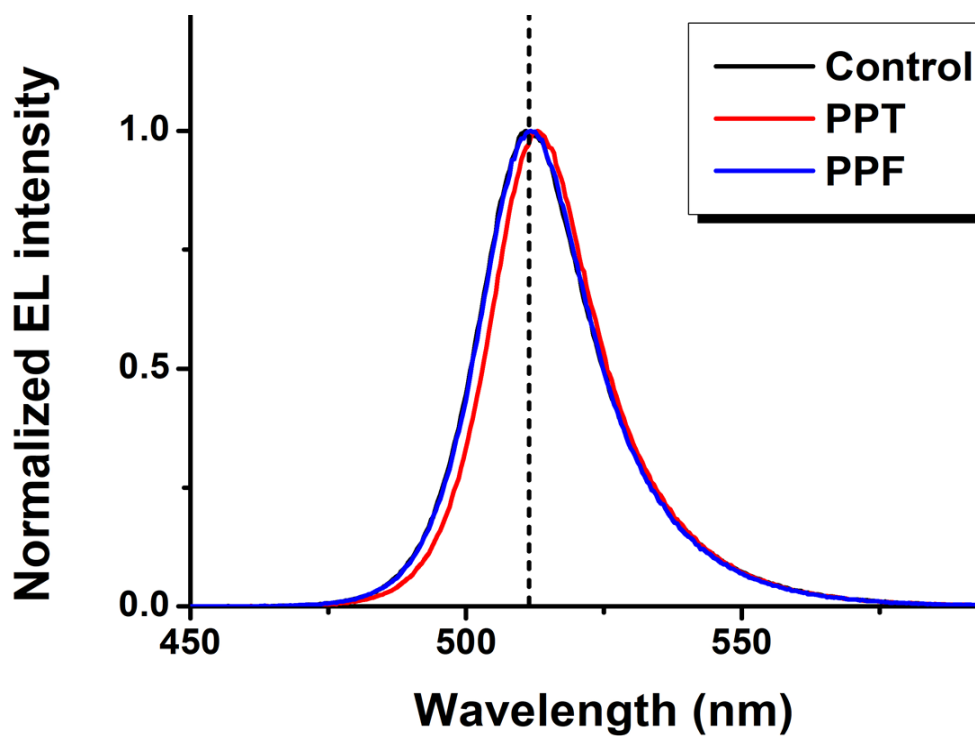

Figure S8. EL curves of the fabricated PeLEDs measured at 4V.

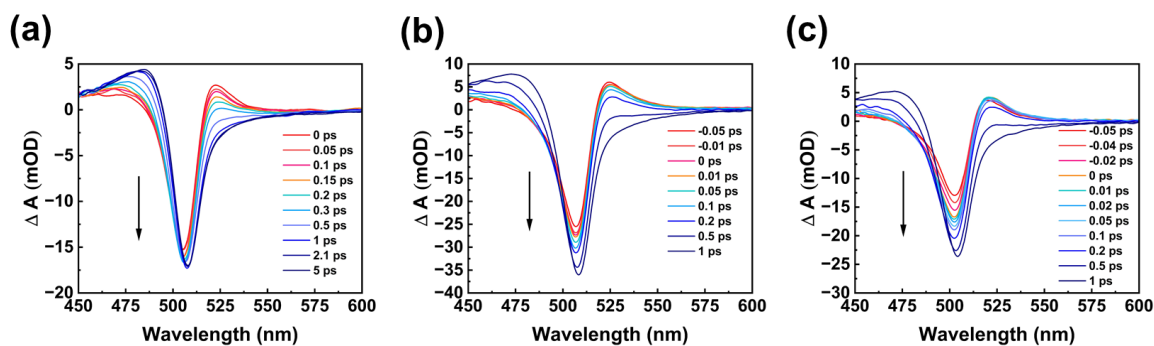

Figure S9. Femtosecond time-resolved TA spectra of (a) pristine, (b) PPT-modified and (c) PPF-modified perovskite films.

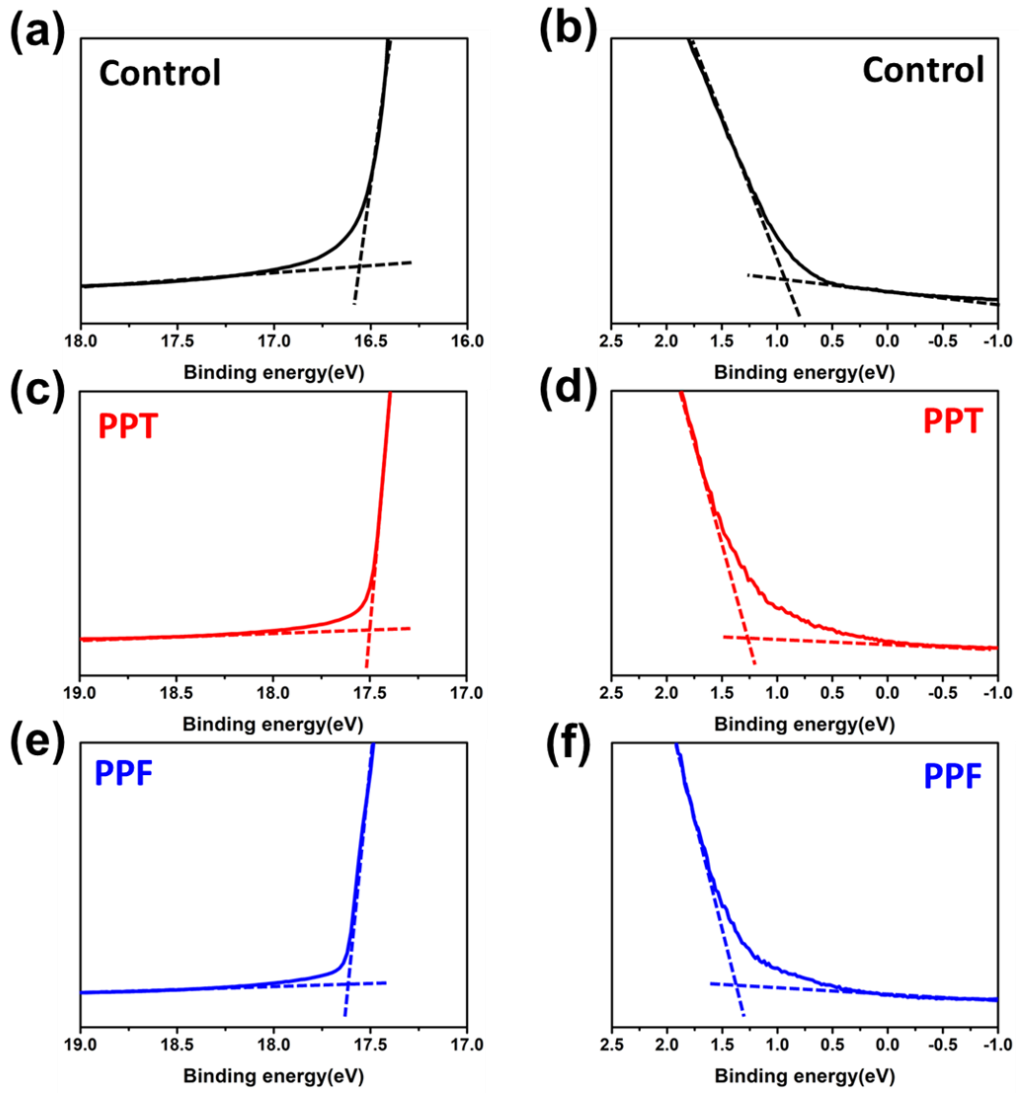

**Figure S10.** UPS results of the (a,b) pristine, (c,d) PPT-modified and (e,f) PPF-modified perovskite films.
